# Supplementary material for: Timing and Length of Nocturnal Sleep and Daytime Napping and Associations With Obesity Types in High-, Middle-, and Low-Income Countries
Source: PubMed Central journal article supplement (PMC8246307; doi:10.1001/jamanetworkopen.2021.13775), 2021-06-30
Supplement: jamanetwopen-e2113775-s001.pdf [file jamanetwopen-e2113775-s001.pdf]

## Supplemental Online Content

Tse LA, Wang C, Rangarajan S, et al. Timing and length of nocturnal sleep and daytime napping and associations with obesity types in high-, middle-, and low-income countries. *JAMA Netw Open*. 2021;4(6):2113775. doi:10.1001/jamanetworkopen.2021.13775

**eFigure.** Flowchart of Recruitment of Baseline Participants

**eTable 1.** Sensitivity Analysis for Sleep Timing, Duration of Nocturnal Sleep and Napping by Using Ethnicity-Specific Criteria to Measure Obesity Outcomes

**eTable 2.** Multilevel Logistic Regression Analyses for Sleep Timing, Duration and Naps After Multiple Imputation

**eAppendix.** Prospective Urban Rural Epidemiology (PURE) Study Group

This supplemental material has been provided by the authors to give readers additional information about their work.

**eFigure.** Flowchart of Recruitment of Baseline Participants

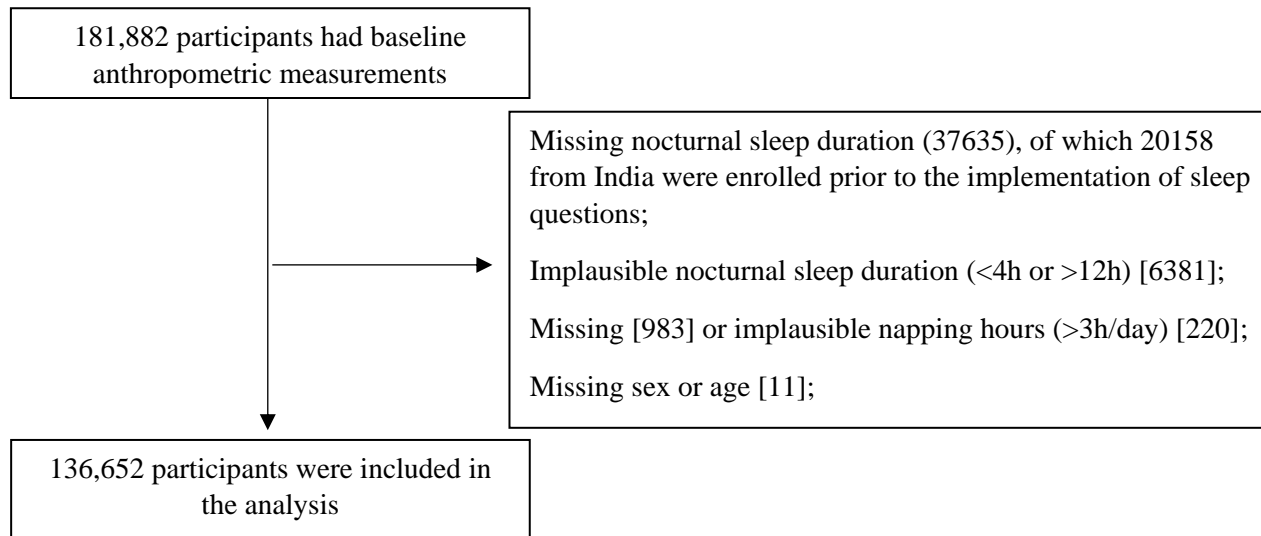

**eTable 1.** Sensitivity Analysis for Sleep Timing, Duration of Nocturnal Sleep and Napping by Using Ethnicity-Specific Criteria to Measure Obesity Outcomes<sup>a</sup>

| Sleep patterns           | General obesity <sup>b</sup> |                          |                  | Abdominal obesity <sup>b</sup> |                          |                  |
|--------------------------|------------------------------|--------------------------|------------------|--------------------------------|--------------------------|------------------|
|                          | No (%)                       | AOR (95% CI)             | P value          | No (%)                         | AOR (95%)                | P value          |
| Bedtime                  |                              |                          |                  |                                |                          |                  |
| Daytime <sup>c</sup>     | 328 (18.5)                   | 1.00 (0.86, 1.17)        | 0.98             | 771 (43.6)                     | 0.93 (0.82, 1.05)        | 0.25             |
| 8PM – 10PM               | 5687 (18.1)                  | 1.0                      |                  | 13631 (43.3)                   | 1.0                      |                  |
| 10PM – 00AM              | 18622 (22.2)                 | <b>1.08 (1.03, 1.14)</b> | <b>&lt;0.001</b> | 42701 (51.0)                   | <b>1.08 (1.04, 1.12)</b> | <b>&lt;0.001</b> |
| 00AM-2AM                 | 5951 (33.2)                  | <b>1.20 (1.13, 1.29)</b> | <b>&lt;0.001</b> | 11379 (63.4)                   | <b>1.21 (1.14, 1.28)</b> | <b>&lt;0.001</b> |
| 2AM – 6AM                | 643 (37.4)                   | <b>1.37 (1.20, 1.56)</b> | <b>&lt;0.001</b> | 1127 (65.5)                    | <b>1.21 (1.06, 1.39)</b> | <b>0.005</b>     |
| Wake-up time             |                              |                          |                  |                                |                          |                  |
| Before 4AM               | 542 (21.3)                   | 0.92 (0.81, 1.06)        | 0.26             | 1338 (52.5)                    | 0.81 (0.72, 0.90)        | <0.001           |
| 4AM-6AM                  | 8120 (20.7)                  | 1.0                      |                  | 19468 (49.6)                   | 1.0                      |                  |
| After 6AM                | 22569 (23.8)                 | <b>1.05 (1.01, 1.09)</b> | <b>0.03</b>      | 48803 (51.5)                   | <b>1.06 (1.03, 1.10)</b> | <b>&lt;0.001</b> |
| Nocturnal sleep duration |                              |                          |                  |                                |                          |                  |
| <5 hours                 | 746 (28.9)                   | <b>1.25 (1.11, 1.41)</b> | <b>&lt;0.001</b> | 1554 (60.3)                    | 1.08 (0.97, 1.21)        | 0.16             |
| 5-6 hours                | 1851 (28.8)                  | <b>1.14 (1.05, 1.23)</b> | <b>0.001</b>     | 3884 (60.4)                    | <b>1.09 (1.02, 1.18)</b> | <b>0.01</b>      |
| 6-7 hours                | 4369 (25.9)                  | 1.04 (0.99, 1.10)        | 0.11             | 9560 (56.8)                    | 1.04 (0.99, 1.09)        | 0.12             |
| 7-8 hours                | 8136 (23.1)                  | 1.0                      |                  | 18521 (52.5)                   | 1.0                      |                  |
| 8-9 hours                | 8781 (20.8)                  | 0.95 (0.91, 0.99)        | 0.02             | 20341 (48.3)                   | 0.96 (0.93, 1.00)        | 0.04             |
| 9-10 hours               | 4843 (21.1)                  | 0.95 (0.90, 1.00)        | 0.04             | 10577 (46.1)                   | 0.92 (0.88, 0.96)        | <0.001           |
| ≥10 hours                | 2505 (23.9)                  | 0.96 (0.90, 1.03)        | 0.30             | 5172 (49.4)                    | 0.95 (0.90, 1.02)        | 0.14             |

|                     |              |                          |                  |              |                          |                  |
|---------------------|--------------|--------------------------|------------------|--------------|--------------------------|------------------|
| Nap duration (hour) |              |                          |                  |              |                          |                  |
| 0h                  | 18520 (22.5) | 1.0                      |                  | 41200 (50.0) | 1.0                      |                  |
| 0-1h                | 9736 (22.9)  | <b>1.14 (1.10, 1.18)</b> | <b>&lt;0.001</b> | 22088 (51.9) | <b>1.18 (1.15, 1.22)</b> | <b>&lt;0.001</b> |
| >1h                 | 2975 (25.6)  | <b>1.20 (1.13, 1.27)</b> | <b>&lt;0.001</b> | 6321 (54.4)  | <b>1.26 (1.20, 1.32)</b> | <b>&lt;0.001</b> |

As for bedtime and wake-up time, adjusted for age, sex, education, location, country income status, smoking, drinking, family history of disease, diabetes, probable depression, physical activity, total energy intake, nocturnal sleep duration, naps and center as random effects;

As for nocturnal sleep duration, adjusted for age, sex, education, location, country income status, smoking, drinking, family history of disease, diabetes, probable depression, physical activity, total energy intake, bedtime, napping and center as random effects;

As for napping, adjusted for age, sex, education, location, country income status, smoking, drinking, family history of disease, diabetes, probable depression, physical activity, total energy intake, bedtime, nocturnal sleep duration and center as random effects.

<sup>a</sup> Analysis population are those with baseline physical measurements (136,652)

<sup>b</sup> Keeping using WHO's criteria for other ethnicities but adopting Chinese obesity criteria to measure general obesity for Chinese population ( $\geq 28\text{kg/m}^2$ ); using IDF's ethnicity-criteria to measure abdominal obesity (WC>90cm or >94cm for male; WC>80cm for female).

<sup>c</sup> Referring to bedtime between 6AM and 8PM.

**eTable 2.** Multilevel Logistic Regression Analyses for Sleep Timing, Duration and Naps After Multiple Imputation

| Sleep schedule/duration  | General obesity <sup>b</sup> |                  | Abdominal obesity <sup>b</sup> |                  |
|--------------------------|------------------------------|------------------|--------------------------------|------------------|
|                          | AOR (95% CI)                 | P value          | AOR (95% CI)                   | P value          |
| Bedtime                  |                              |                  |                                |                  |
| Daytime <sup>a</sup>     | <b>1.17 (1.10 - 1.26)</b>    | <b>&lt;0.001</b> | <b>1.15 (1.08 - 1.22)</b>      | <b>&lt;0.001</b> |
| 8PM – 10PM               | 1.0                          |                  | 1.0                            |                  |
| 10PM – 00AM              | <b>1.07 (1.03 - 1.12)</b>    | <b>0.002</b>     | <b>1.07 (1.03 - 1.12)</b>      | <b>&lt;0.001</b> |
| 00AM-2AM                 | <b>1.21 (1.14 - 1.29)</b>    | <b>&lt;0.001</b> | <b>1.21 (1.14 - 1.28)</b>      | <b>&lt;0.001</b> |
| 2AM – 6AM                | <b>1.29 (1.16 - 1.44)</b>    | <b>&lt;0.001</b> | <b>1.41 (1.26 - 1.59)</b>      | <b>&lt;0.001</b> |
| Wake-up time             |                              |                  |                                |                  |
| Before 4AM               | <b>0.89 (0.82 – 0.97)</b>    | <b>0.008</b>     | <b>0.88 (0.81 – 0.96)</b>      | <b>0.003</b>     |
| 4AM-6AM                  | 1.0                          |                  | 1.0                            |                  |
| After 6AM                | 1.03 (0.99 - 1.07)           | 0.17             | 1.03 (0.98 - 1.07)             | 0.19             |
| Nocturnal sleep duration |                              |                  |                                |                  |
| <5 hours                 | <b>1.19 (1.10 - 1.29)</b>    | <b>&lt;0.001</b> | <b>1.14 (1.06 - 1.22)</b>      | <b>&lt;0.001</b> |
| 5-6 hours                | <b>1.11 (1.04 - 1.18)</b>    | <b>0.00</b>      | 1.06 (0.99 - 1.13)             | 0.09             |
| 6-7 hours                | 1.04 (0.99 - 1.09)           | 0.08             | 1.04 (1.00 - 1.09)             | 0.06             |
| 7-8 hours                | 1.0                          |                  | 1.0                            |                  |
| 8-9 hours                | 0.95 (0.91 - 0.99)           | 0.01             | 0.98 (0.94 - 1.02)             | 0.32             |
| 9-10 hours               | 0.96 (0.92 - 1.01)           | 0.12             | 0.99 (0.95 - 1.04)             | 0.67             |
| >10 hours                | 0.98 (0.92 - 1.04)           | 0.52             | 1.00 (0.94 - 1.05)             | 0.87             |
| Nap duration (hour)      |                              |                  |                                |                  |
| 0                        | <b>1.0</b>                   |                  | <b>1.0</b>                     |                  |
| 0-1                      | <b>1.12 (1.09 - 1.16)</b>    | <b>&lt;0.001</b> | <b>1.15 (1.12 - 1.19)</b>      | <b>&lt;0.001</b> |
| ≥1                       | <b>1.15 (1.09 - 1.21)</b>    | <b>&lt;0.001</b> | <b>1.29 (1.23 - 1.35)</b>      | <b>&lt;0.001</b> |

Analysis population are those with baseline physical measurements after multiple imputation of missing data of sleep (161,724).

Sleep timing: Adjusted for age, sex, education, location, country income status, smoking, drinking, family history of disease, diabetes, depression, physical activity, total energy intake, nocturnal sleep duration, naps, and center as random effect.

Nocturnal sleep duration: Adjusted for age, sex, education, location, country income status, smoking, drinking, family history of disease, diabetes, depression, physical activity, total energy intake, bedtime, naps, and center as random effect.

Nap duration: Adjusted for age, sex, education, location, country income status, smoking, drinking, family history of disease, diabetes, depression, physical activity, total energy intake, nocturnal sleep duration, bedtime, and center as random effect.

<sup>a</sup> Referring to bedtime between 6AM and 8PM.

<sup>b</sup> Keeping using WHO's criteria for other ethnicities but adopting Chinese obesity criteria to measure general obesity for Chinese population ( $\geq 28\text{kg/m}^2$ ); using IDF's ethnicity-criteria to measure abdominal obesity ( $\text{WC} > 90\text{cm}$  or  $> 94\text{cm}$  for male;  $\text{WC} > 80\text{cm}$  for female).

**eAppendix.** Prospective Urban Rural Epidemiology (PURE) Study Group

**PURE Project Office Staff, National Coordinators, Investigators, and Key Staff:**  
**Project office (Population Health Research Institute, Hamilton Health Sciences and McMaster University, Hamilton, Canada):** S. Yusuf\* (principal investigator).

S. Rangarajan (Program Manager Manager); K. K. Teo, S. S. Anand, C. K. Chow, M. O'Donnell, A. Mente, D. Leong, A. Smyth, P. Joseph, M. Duong, O. Kurmi, R. D'Souza, M. Walli-Attaei, B. Balaji, R. Naito, S. Islam (Statistician), W. Hu (Statistician), C. Ramasundarahettige (Statistician), P. Sheridan (Statistician), S. Bangdiwala, L. Dyal, A. Casanova, M. Dehghan (Nutrition Epidemiologist), G. Lewis (Associate Program Manager), D. Agapay, A. Aliberti, N. Aoucheva, A. Arshad, A. Reyes, B. Bideri, R. Buthool, S. Chin, M. Di Marino, R. Frances, S. Gopal, M. Jakymyshn, N. Kandy, I. Kay, J. Lindeman, G. McAlpine, E. McNeice, M(a). Mushtaha, M(o). Mushtaha, R. Patel, D. Pattath, S. Ramacham, E. Ramezani, J. Rimac, F. Shifaly, J. Swallow, M. Trottier, S. Trottier, R. Solano, A. Zaki, B. Zhang, V. Zhang

**Core Laboratories:** M. McQueen, S. Lamers, J. Keys (Hamilton), X. Wang (Beijing, China), A. Devanath (Bangalore, India).

**Argentina:** R. Diaz\*, A. Orlandini, P. Lamelas, M. L. Diaz, A. Pascual, M. Salvador, C. Chacon; **Bangladesh:** O. Rahman\*, R. Yusuf\*, S. A. K. S. Ahmed, T. Choudhury, M. Sintaha, A. Khan, O. Alam, N. Nayeem, S. N. Mitra, S. Islam, F. Pasha; **Brazil:** A. Avezum\*, C. S. Marcilio, A. C. Mattos, G. B. Oliveira; **Canada:** K. Teo\*, S. Yusuf\*, Sumathy Rangarajan, A. Arshad, B. Bideri, I. Kay, J. Rimac, R. Buthool, S. Trottier, G. Dagenais, P. Poirier, G. Turbide, D. Auger, A. LeBlanc De Bluts, M. C. Proulx, M. Cayer, N. Bonneville, S. Lear, V. de Jong, A. N. Saidy, V. Kandola, E. Corber, I. Vukmirovich, D. Gasevic, A. Wielgosz, A. Pipe, A. Lefebvre, A. Pepe, A. Auclair, A. Prémont, A. S. Bourlaud; **Chile:** F. Lanas\*, P. Serón, M. J. Oliveros, F. Cazor, Y. Palacios; **China:** Liu Lisheng\*, Li Wei\*, Chen Chunming#, Zhao Wenhua, Hu Bo, Yin Lu, Zhu Jun, Sun Yi, Wang Yang, Deng Qing, Jia Xuan, Zhang Hongye, Bo Jian, Liang Yan, He Xinye, Xie Liya, Liu Zhiguang, Yao Chenrui, Wang Xingyu, Liu Xu, Gao Nan, Bai Xiulin, Cheng Xiaoru, Wang Chuangshi, Li Sidong, Liu Weida, Lang Xinyue, Liu Xiaoyun, Zhu Yibing, Ren Yingjuan, Dai Xi, Wang Liping, Han Guoliang, Song Rui, Cao Zhuangni, Sun Yaya, Li Xiangrong, Wang Jing, Wang Li, Peng Ya, Li Xiaoqing, Li Ling, Wang Jia, Zou Jianmei, Gao Fan, Tian Shaofang, Li Yongmei, Bi Yanhui, Li Xin, Zhang Anran, Wu Dandan, Cheng ying, Xiao Yize, Lu Fanghong, Li Yindong, Hou Yan, Zhang Liangqing, Guo Baoxia, Liao Xiaoyang, Chen Di, Zhang Peng, Li Ning, Ma Xiaolan, Lei Rensheng, Fu Minfan, Liu Yu, Xing Xiaojie, Yang Youzhu, Zhao Shenghu, Xiang Quanyong, Tang Jinhua, Liu Zhengrong, Qiang Deren, Li Xiaoxia, Xu Zhengting, Aideeraili. Ayoupu, Zhao Qian; **Colombia:** P. Lopez-Jaramillo\*, P. A. Camacho-Lopez, J. Otero-Wandurraga, D. I. Molina, C. Cure-Cure, M. Perez, E. Hernandez, E. Arcos, C. Narvaez, A. Sotomayor, H. Garcia, G. Sanchez, F. Cotes, A. Rico, M. Duran, C. Torres; **India:** P. Mony\*, M. Vaz\*, S. Swaminathan, K. Shankar, A. V. Kurpad, K. G. Jayachitra, N. Kumar, H. A. L. Hospital, V. Mohan\*, M. Deepa, K. Parthiban, M. Anitha, S. Hemavathy, T. Rahulashankiruthiyayan, D. Anitha, R. M. Anjana, R. Dhanasekar and S. Sureshkumar, D. Anitha, K. Sridevi, R. Gupta\*, R. B. Panwar, I. Mohan, P. Rastogi, S. Rastogi, R. Bhargava, R. Kumar, J. S. Thakur, B. Patro, R. Mahajan, P. Chaudary, V. Raman Kutty, K. Vijayakumar\*, K. Ajayan, G. Rajasree, A. R. Renjini, A. Deepu, B. Sandhya, S. Asha, H. S. Soumya, R. Kumar\*, M. Kaur, P. V.

M. Lakshmi, V. Sagar; **Iran:** R. Kelishadi\*, A. Bahonar, N. Mohammadifard, H. Heidari; **Kazakhstan:** K. Davletov\*, B. Assembekov, B. Amirov; **Kyrgyzstan:** E. Mirrakhimov\*, S. Abilova, U. Zakirov, U. Toktomamatov; **Malaysia:** K. Yusoff\*, R. Ismail, T. S. T. Ismail, K. K. Ng, A. Devi, N. M. Nasir, M. M. Yasin, M. Miskan, E. A. Rahman, M. K. M. Arsad, F. Ariffin, S. A. Razak, F. A. Majid, N. A. Bakar, M. Y. Yacob, N. Zainon, R. Salleh, M. K. A. Ramli, N. A. Halim, S. R. Norlizan, N. M. Ghazali, M. N. Arshad, R. Razali, S. Ali, H. R. Othman, C. W. J. C. W. Hafar, A. Pit, N. Danuri, F. Basir, S. N. A. Zahari, H. Abdullah, M. A. Arippin, N. A. Zakaria, I. Noorhassim, M. J. Hasni, M. T. Azmi, M. I. Zaleha, K. Y. Hazdi, A. R. Rizam, W. Sazman, A. Azman; **Occupied Palestinian Territory:** R. Khatib\*, U. Khammash, R. Giacaman; **Pakistan:** R. Iqbal\*, R. Khawaja, I. Azam, K. Kazmi; **Peru:** J. Miranda\*, A. Bernabe Ortiz, W. Checkley, R. H. Gilman, L. Smeeth, R. M. Carrillo, M. de los Angeles, C. Tarazona Meza; **Philippines:** A. Dans\*, H. U. Co, J. T. Sanchez, L. Pudol, C. Zamora-Pudol, L. A. M. Palileo-Villanueva, M. R. Aquino, C. Abaquin, S. L. Pudol, K. Manguiat, S. Malayang; **Poland:** W. Zatonski\*, A. Szuba, K. Zatonka, R. Ilow<sup>#</sup>, M. Ferus, B. Regulska-Ilow, D. Rózańska, M. Wolyniec; **Saudi Arabia:** K. F. AlHabib\*, M. Alshamiri, H. B. Altaradi, O. Alnobani, N. Alkamel, M. Ali, M. Abdulrahman, R. Nouri; **South Africa:** L. Kruger\*, A. Kruger<sup>#</sup>, P. Bestra, H. H. Voster, A. E. Schutte, E. Wentzel-Viljoen, F. C. Eloff, H. de Ridder, H. Moss, J. Potgieter, A. A. Roux, M. Watson, G. de Wet, A. Olckers, J. C. Jerling, M. Pieters, T. Hoekstra, T. Puoane, R. Swart\*, E. Igumbor, L. Tsolekile, K. Ndayi, D. Sanders, P. Naidoo, N. Steyn, N. Peer, B. Mayosi<sup>#</sup>, B. Rayner, V. Lambert, N. Levitt, T. Kolbe-Alexander, L. Ntyintyane, G. Hughes, J. Fourie, M. Muzigaba, S. Xapa, N. Gobile, K. Ndayi, B. Jwili, K. Ndibaza, B. Egbujie; **Sweden:** A. Rosengren\*, K. Bengtsson Boström, A. Rawshani, A. Gustavsson, M. Andreasson, L. Wirdemann; **Tanzania:** K. Yeates\*, M. Oresto, N. West; **Turkey:** A. Oguz\*, N. Imeryuz, Y. Altuntas, S. Gulec, A. Temizhan, K. Karsidag, K. B. T. Calik, A. K. Akalin, O. T. Caklili, M. V. Keskinler, K. Yildiz; **United Arab Emirates:** A. H. Yusufali, F. Hussain, M. H. S. Abdelmotagali, D. F. Youssef, O. Z. S. Ahmad, F. H. M. Hashem, T. M. Mamdouh, F. M. AbdRabbou, S. H. Ahmed, M. A. AlOmairi, H. M. Swidan, M. Omran, N. A. Monsef; **Zimbabwe:** J. Chifamba\*, T. Ncube, B. Ncube, C. Chimhete, G. K. Neya, T. Manenji, L. Gwaunza, V. Mapara, G. Terera, C. Mahachi, P. Murambiwa, R. Mapanga, A. Chinhara

\*National Coordinator

<sup>#</sup>Deceased
